# Supplementary material
Source: publisher figshare collection journal article supplement (https://tandf.figshare.com/ndownloader/files/13255790)

**A journey through time: exploring temporal patterns among digitised plant specimens from Australia**

Md. Mohasinul Haque, David A. Nipperess, John B. Baumgartner, Linda J. Beaumont

*Correspondence: Md. Mohasinul Haque, Department of Biological Sciences, NSW 2109, Australia. Email: md-mohasinul.haque@hdr.mq.edu.au

**Appendix 1.** Relationship between estimate of inventory completeness and number of unique records (i.e. unique combination of date, location of collection and species name); dashed line indicates 200 unique records. Each dot in the graph represents a sampling unit of 50 x 50 km.


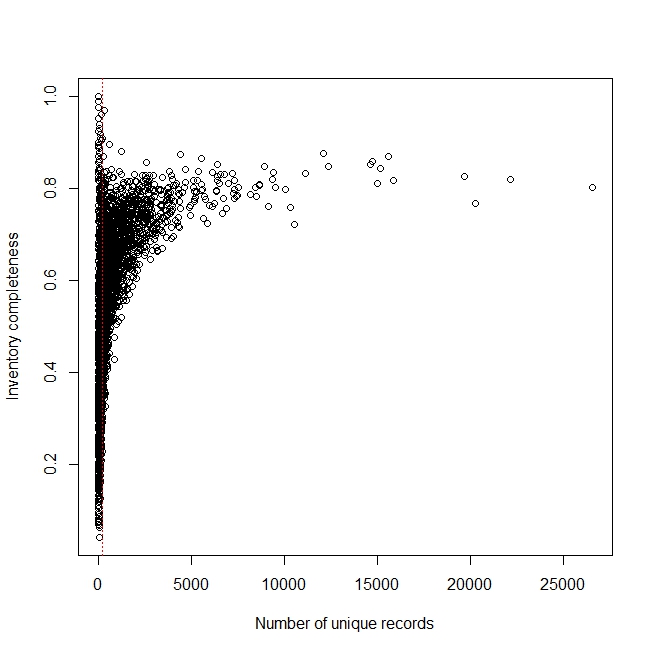

Supplement: Supplementary file 1 [file 13255790]
